# Supplementary material for: Persuasive System Design Principles and Behavior Change Techniques to Stimulate Motivation and Adherence in Electronic Health Interventions to Support Weight Loss Maintenance: Scoping Review
Source: PubMed Central journal article supplement (PMC6611151; doi:10.2196/14265), 2019-06-21
Supplement: jmir_v21i6e14265_app1.pdf [file jmir_v21i6e14265_app1.pdf]

## Multimedia Appendix 1 Cluster label and component BCTs AU, % (SE) (Michie et al, 2013)

|                                                                 |           |                                                              |            |
|-----------------------------------------------------------------|-----------|--------------------------------------------------------------|------------|
| <b>(1) Scheduled consequences</b>                               | 91 (.004) | <b>(8) Feedback and monitoring</b>                           | 97 (.002)  |
| Punishment [14.2]                                               |           | Feedback on behavior [2.2]                                   |            |
| Response cost [14.1]                                            |           | Biofeedback [2.6]                                            |            |
| Chaining [14.5]                                                 |           | Other(s) monitoring with awareness [2.1 and 2.5]             |            |
| Extinction [14.3]                                               |           | Self-monitoring of outcome of behavior [2.4]                 |            |
| Discrimination training [14.6]                                  |           | Self-monitoring of behavior [2.3]                            |            |
| Shaping [14.4]                                                  |           | <b>(9) Goals and planning</b>                                | 90 (.002)  |
| Negative reinforcement [14.10]                                  |           | Action planning (including implementation intentions) [1.4]  |            |
| Counter-conditioning [14.7]                                     |           | Problem solving/coping planning [1.2]                        |            |
| Thinning [14.9]                                                 |           | Commitment [1.9]                                             |            |
| Differential reinforcement [14.8]                               |           | Goal setting (outcome) [1.3]                                 |            |
| <b>(2) Reward and threat</b>                                    | 90 (.005) | Behavioral contract [1.8]                                    |            |
| Social reward [10.4]                                            |           | Discrepancy between current behavior and goal standard [1.6] |            |
| Material reward [10.2]                                          |           | Goal setting (behavior) [1.1]                                |            |
| Self-reward [10.9]                                              |           | Review behavior goal(s) [1.5]                                |            |
| Non-specific reward [10.3]                                      |           | Review of outcome goal(s) [1.7]                              |            |
| Threat [10.11]                                                  |           | <b>(10) Social support</b>                                   | 100 (.001) |
| Anticipation of future rewards or removal of punishment [14.10] |           | Social support (practical) [3.2]                             |            |
| Incentive [10.1]                                                |           | Social support (general) [3.1]                               |            |
| <b>(3) Repetition and substitution</b>                          | 97 (.002) | Social support (emotional) [3.3]                             |            |
| Behavior substitution [8.2]                                     |           | <b>(11) Comparison of behavior</b>                           | 83 (.006)  |
| Habit reversal [8.4]                                            |           | Modeling of the behavior [6.1]                               |            |
| Habit formation [8.3]                                           |           | Information about others' approval [6.3]                     |            |
| Graded tasks [8.7]                                              |           | Social comparison [6.2]                                      |            |
| Overcorrection [8.5]                                            |           | <b>(12) Self-belief</b>                                      | 92 (.005)  |
| Behavioral rehearsal/practice [8.1]                             |           | Mental rehearsal of successful performance [15.2]            |            |
| Generalization of a target behavior [8.6]                       |           | Self-talk [15.4]                                             |            |
| <b>(4) Antecedents</b>                                          | 96 (.002) | Focus on past success [15.3]                                 |            |
| Restructuring the physical environment [12.1]                   |           | Verbal persuasion to boost self-efficacy [15.1]              |            |
| Restructuring the social environment [12.2]                     |           | <b>(13) Comparison of outcomes</b>                           | 90 (.005)  |
| Avoidance/changing exposure to cues for the behavior [12.3]     |           | Persuasive argument [9.1]                                    |            |
| Distraction [12.4]                                              |           | Pros and cons [9.2]                                          |            |
| <b>(5) Associations</b>                                         | 97 (.002) | Comparative imagining of future outcomes [9.3]               |            |
| Discriminative (learned) cue [7.2]                              |           | <b>(14) Identity</b>                                         | 86 (.006)  |
| Time out [7.4]                                                  |           | Identification of self as role model [13.1]                  |            |
| Escape learning [7.5]                                           |           | Self-affirmation [13.4]                                      |            |
| Satiation [7.6]                                                 |           | Identity associated with changed behavior [13.5]             |            |
| Exposure [7.7]                                                  |           | Reframing [13.2]                                             |            |
| Classical conditioning [7.8]                                    |           | Cognitive dissonance [13.3]                                  |            |
| Fading [7.3]                                                    |           | <b>(15) Shaping knowledge</b>                                | 95 (.003)  |
| Prompts/cues [7.1]                                              |           | Reattribution [4.3]                                          |            |
| <b>(6) Covert learning</b>                                      | 73 (.008) | Antecedents [4.2]                                            |            |
| Vicarious reinforcement [16.3]                                  |           | Behavioral experiments [4.4]                                 |            |
| Covert sensitization [16.1]                                     |           | Instruction on how to perform a behavior [4.1]               |            |
| Covert conditioning [16.2]                                      |           | <b>(16) Regulation</b>                                       | 98 (.001)  |
| <b>(7) Natural consequences</b>                                 | 85 (.006) | Regulate negative emotions [11.2]                            |            |
| Cluster label and component BCTs AU, % (SE)                     |           | Conserving mental resources [11.3]                           |            |
| Health consequences [5.1]                                       |           | Pharmacological support [11.1]                               |            |
| Social and environmental consequences [5.3]                     |           | Paradoxical instructions [11.4]                              |            |
| Saliency of consequences [5.2]                                  |           |                                                              |            |
| Emotional consequences [5.6]                                    |           |                                                              |            |
| Self-assessment of affective consequences [5.4]                 |           |                                                              |            |
| Anticipated regret [5.5]                                        |           |                                                              |            |
