# Supplementary material for: Persuasive System Design Principles and Behavior Change Techniques to Stimulate Motivation and Adherence in Electronic Health Interventions to Support Weight Loss Maintenance: Scoping Review
Source: PubMed Central journal article supplement (PMC6611151; doi:10.2196/14265), 2019-06-21
Supplement: jmir_v21i6e14265_app3.pdf [file jmir_v21i6e14265_app3.pdf]

### Multimedia Appendix 3 Search strategy

| # | Search strategy:                                                                                                                                                                                                                                                                       |
|---|----------------------------------------------------------------------------------------------------------------------------------------------------------------------------------------------------------------------------------------------------------------------------------------|
| 1 | (obes* or overweight or (weight adj1 (maintenance or stabilisation or stabilization or management or loss))).tw.                                                                                                                                                                       |
| 2 | (e?health or e health or m?health or m health or online or mobile health or telemedicine or social media or web based or smartphone* or ((mobile or cellular or smart) adj phone*) or ((mobile or cellular or internet or smartphone*) adj3 (app* or technology or intervention))).tw. |
| 3 | (motivat* or adhere* or compliance).tw.                                                                                                                                                                                                                                                |
| 4 | (behavio* adj1 chang*).tw.                                                                                                                                                                                                                                                             |
| 5 | 1 and 2 and 3 and 4                                                                                                                                                                                                                                                                    |
| 6 | remove duplicates from 5                                                                                                                                                                                                                                                               |
| 7 | limit 6 to yr="2007 -Current"                                                                                                                                                                                                                                                          |
