# Supplementary material for: Persuasive System Design Principles and Behavior Change Techniques to Stimulate Motivation and Adherence in Electronic Health Interventions to Support Weight Loss Maintenance: Scoping Review
Source: PubMed Central journal article supplement (PMC6611151; doi:10.2196/14265), 2019-06-21
Supplement: jmir_v21i6e14265_app7.pdf [file jmir_v21i6e14265_app7.pdf]

**Multimedia Appendix 7 Overview over behavior change theories and techniques used in the included eHealth interventions**

| Study ID | a) Social cognitive theory | b) Cognitive behavioral therapy, ABC model | c) Health Action Process approach model | d) The transtheoretical model | e) Goal setting and action theories | f) Self-regulation theory | g) Regulatory Fit theory | h) Control Theory | i) Self-determination theory | j) Social Support Theories | k) Motivational Interviewing | l) Stroebe's theory on behavior change | m) Conservation of Resources Theory | n) Michies Behavior Change Wheel | 1) Scheduled consequences | 2) Reward and threat | 3) Repetition and substitution | 4) Antecedents | 5) Associations | 6) Covert Learning | 7) Natural consequences | 8) Feedback and monitoring | 9) Goals and planning | 10) Social support | 11) Comparison behavior | 12) Self-belief | 13) Comparison of outcomes | 14) Identity | 15) Shaping knowledge | 16) Regulations | Stimulate adherence | Stimulate motivation |  |
|----------|----------------------------|--------------------------------------------|-----------------------------------------|-------------------------------|-------------------------------------|---------------------------|--------------------------|-------------------|------------------------------|----------------------------|------------------------------|----------------------------------------|-------------------------------------|----------------------------------|---------------------------|----------------------|--------------------------------|----------------|-----------------|--------------------|-------------------------|----------------------------|-----------------------|--------------------|-------------------------|-----------------|----------------------------|--------------|-----------------------|-----------------|---------------------|----------------------|--|
| W M 1    | ✓                          | ✓                                          | ✓                                       |                               |                                     | ✓                         |                          |                   |                              |                            |                              | ✓                                      |                                     |                                  |                           |                      | ✓                              | ✓              | ✓               |                    | ✓                       | ✓                          | ✓                     |                    | ✓                       |                 |                            |              |                       |                 | ✓                   |                      |  |
| W M 2    |                            |                                            |                                         |                               |                                     | ✓                         |                          |                   |                              |                            |                              |                                        |                                     |                                  |                           |                      | ✓                              | ✓              | ✓               |                    | ✓                       | ✓                          | ✓                     |                    | ✓                       | ✓               |                            |              |                       |                 |                     | ✓                    |  |
| W M 3    |                            |                                            |                                         |                               |                                     |                           |                          |                   |                              |                            |                              |                                        |                                     |                                  | ✓                         |                      |                                |                | ✓               |                    |                         | ✓                          | ✓                     | ✓                  |                         |                 |                            |              |                       | ✓               |                     |                      |  |
| W M 4    |                            |                                            |                                         | ✓                             |                                     |                           |                          |                   |                              |                            |                              |                                        |                                     |                                  |                           | ✓                    |                                |                |                 |                    | ✓                       | ✓                          | ✓                     | ✓                  |                         |                 |                            |              |                       |                 |                     | ✓                    |  |
| W M 5    |                            |                                            |                                         |                               |                                     |                           |                          |                   |                              |                            |                              |                                        |                                     |                                  | ✓                         |                      |                                |                | ✓               |                    | ✓                       | ✓                          |                       |                    |                         |                 |                            |              |                       | ✓               | ✓                   |                      |  |
| W M 6    |                            |                                            |                                         | ✓                             |                                     |                           |                          |                   | ✓                            | ✓                          |                              |                                        |                                     |                                  | ✓                         |                      |                                | ✓              |                 |                    | ✓                       | ✓                          | ✓                     |                    |                         |                 |                            | ✓            |                       | ✓               | ✓                   |                      |  |
| W M 7    |                            |                                            |                                         |                               | ✓                                   | ✓                         |                          |                   |                              |                            |                              |                                        |                                     |                                  |                           |                      | ✓                              | ✓              | ✓               |                    | ✓                       | ✓                          | ✓                     |                    |                         | ✓               |                            |              |                       | ✓               | ✓                   |                      |  |
| W M 8    |                            |                                            |                                         |                               |                                     |                           |                          |                   |                              |                            | ✓                            |                                        |                                     |                                  |                           |                      |                                |                |                 |                    | ✓                       | ✓                          | ✓                     |                    |                         |                 |                            |              |                       | ✓               | ✓                   |                      |  |
| W M 9    |                            |                                            |                                         |                               |                                     |                           |                          |                   |                              |                            |                              |                                        |                                     |                                  |                           |                      |                                |                |                 |                    | ✓                       | ✓                          | ✓                     |                    |                         |                 |                            |              |                       | ✓               | ✓                   |                      |  |
| W M 10   |                            | ✓                                          |                                         |                               |                                     |                           |                          |                   |                              |                            |                              |                                        |                                     |                                  | ✓                         | ✓                    | ✓                              | ✓              |                 | ✓                  | ✓                       | ✓                          |                       | ✓                  |                         |                 |                            |              | ✓                     | ✓               | ✓                   |                      |  |
| W M 11   |                            |                                            |                                         |                               |                                     |                           |                          |                   |                              |                            |                              |                                        |                                     |                                  |                           | ✓                    |                                |                |                 |                    | ✓                       | ✓                          | ✓                     |                    |                         |                 |                            |              | ✓                     | ✓               | ✓                   |                      |  |
| WL 1     | ✓                          |                                            |                                         |                               |                                     |                           |                          |                   |                              |                            |                              |                                        |                                     |                                  | ✓                         | ✓                    |                                | ✓              |                 | ✓                  | ✓                       | ✓                          | ✓                     | ✓                  |                         | ✓               | ✓                          | ✓            | ✓                     | ✓               | ✓                   |                      |  |
| WL 2     |                            |                                            |                                         |                               |                                     |                           |                          |                   |                              |                            |                              |                                        |                                     |                                  |                           |                      |                                |                |                 |                    | ✓                       | ✓                          |                       |                    |                         |                 |                            | ✓            |                       |                 |                     | ✓                    |  |
| WL 3     |                            |                                            |                                         |                               |                                     |                           |                          |                   |                              |                            |                              |                                        |                                     |                                  |                           |                      |                                |                |                 |                    | ✓                       | ✓                          |                       |                    |                         |                 |                            |              |                       | ✓               |                     |                      |  |
| WL 4     |                            |                                            |                                         |                               |                                     |                           |                          |                   |                              |                            |                              |                                        |                                     |                                  | ✓                         | ✓                    |                                |                |                 |                    | ✓                       | ✓                          | ✓                     |                    |                         |                 | ✓                          | ✓            | ✓                     | ✓               | ✓                   |                      |  |
