# Supplementary material for: Persuasive System Design Principles and Behavior Change Techniques to Stimulate Motivation and Adherence in Electronic Health Interventions to Support Weight Loss Maintenance: Scoping Review
Source: PubMed Central journal article supplement (PMC6611151; doi:10.2196/14265), 2019-06-21
Supplement: jmir_v21i6e14265_app8.pdf [file jmir_v21i6e14265_app8.pdf]

**Multimedia Appendix 8 Overview over PSD principles used in the included eHealth interventions**

| Study ID | Primary task support |              |              |                    |                    |               |              | Dialogue support |            |              |                |               |           |                | Social support     |                      |                        |                        |                |                |                | Other       |                 |                   |                     |                      |   |
|----------|----------------------|--------------|--------------|--------------------|--------------------|---------------|--------------|------------------|------------|--------------|----------------|---------------|-----------|----------------|--------------------|----------------------|------------------------|------------------------|----------------|----------------|----------------|-------------|-----------------|-------------------|---------------------|----------------------|---|
|          | a) Reduction         | b) Tunneling | c) Tailoring | d) Personalization | e) Self-monitoring | f) Simulation | g) Rehearsal | h) Praise        | i) Rewards | j) Reminders | k) Suggestions | l) Similarity | m) Liking | n) Social role | o) Social learning | p) Social comparison | q) Normative influence | r) Social facilitation | s) Cooperation | t) Competition | u) Recognition | v) Feedback | w) Goal-setting | x) Social support | Stimulate adherence | Stimulate motivation |   |
| WM 1     |                      |              | ✓            | ✓                  | ✓                  | ✓             |              | ✓                |            | ✓            | ✓              |               |           |                |                    |                      |                        |                        |                |                |                | ✓           | ✓               |                   | ✓                   | ✓                    |   |
| WM 2     |                      |              | ✓            | ✓                  | ✓                  | ✓             |              | ✓                |            | ✓            |                |               |           |                |                    |                      |                        |                        |                |                |                |             | ✓               | ✓                 | ✓                   |                      | ✓ |
| WM 3     |                      |              | ✓            |                    | ✓                  |               |              | ✓                | ✓          |              |                |               |           |                |                    |                      | ✓                      |                        |                |                |                |             | ✓               | ✓                 | ✓                   | ✓                    |   |
| WM 4     |                      |              | ✓            |                    | ✓                  | ✓             |              | ✓                | ✓          | ✓            |                |               |           |                |                    |                      |                        |                        |                |                |                |             | ✓               | ✓                 |                     |                      | ✓ |
| WM 5     |                      |              | ✓            |                    | ✓                  |               |              | ✓                | ✓          |              |                |               |           |                |                    |                      |                        |                        |                |                |                |             | ✓               | ✓                 |                     | ✓                    | ✓ |
| WM 6     | ✓                    | ✓            | ✓            | ✓                  | ✓                  | ✓             | ✓            |                  | ✓          | ✓            | ✓              |               |           |                |                    |                      |                        |                        |                |                |                |             | ✓               | ✓                 | ✓                   | ✓                    | ✓ |
| WM 7     | ✓                    | ✓            | ✓            | ✓                  | ✓                  | ✓             |              | ✓                | ✓          | ✓            |                |               |           | ✓              | ✓                  |                      | ✓                      | ✓                      |                |                |                |             | ✓               | ✓                 | ✓                   | ✓                    | ✓ |
| WM 8     |                      |              | ✓            | ✓                  | ✓                  | ✓             |              | ✓                |            | ✓            | ✓              |               |           |                |                    |                      |                        |                        |                |                |                |             | ✓               | ✓                 | ✓                   | ✓                    | ✓ |
| WM 9     |                      |              | ✓            | ✓                  | ✓                  | ✓             |              |                  |            |              |                |               |           |                |                    |                      |                        |                        |                |                |                |             | ✓               | ✓                 | ✓                   | ✓                    |   |
| WM 10    | ✓                    | ✓            | ✓            | ✓                  | ✓                  | ✓             | ✓            | ✓                | ✓          | ✓            | ✓              |               | ✓         |                | ✓                  |                      |                        |                        |                |                | ✓              | ✓           |                 |                   |                     | ✓                    |   |
| WM 11    |                      |              | ✓            | ✓                  | ✓                  |               |              |                  |            | ✓            |                |               |           |                |                    |                      |                        |                        |                |                |                |             | ✓               | ✓                 | ✓                   | ✓                    | ✓ |
| WL 1     | ✓                    | ✓            | ✓            | ✓                  | ✓                  | ✓             | ✓            | ✓                | ✓          | ✓            | ✓              |               | ✓         |                | ✓                  | ✓                    | ✓                      |                        | ✓              |                |                | ✓           | ✓               | ✓                 |                     | ✓                    |   |
| WL 2     |                      |              | ✓            |                    | ✓                  |               |              | ✓                |            | ✓            | ✓              |               |           |                |                    |                      |                        |                        |                |                |                |             | ✓               | ✓                 |                     |                      | ✓ |
| WL 3     |                      |              | ✓            |                    | ✓                  |               |              |                  |            |              |                |               |           |                |                    |                      |                        |                        |                |                |                |             | ✓               | ✓                 |                     | ✓                    |   |
| WL 4     |                      |              |              |                    |                    |               |              |                  |            | ✓            |                |               |           |                |                    |                      |                        |                        |                |                |                |             | ✓               | ✓                 |                     | ✓                    |   |
| WL 5     |                      |              | ✓            |                    |                    |               |              | ✓                |            | ✓            | ✓              |               |           |                |                    |                      |                        |                        |                |                |                |             | ✓               |                   |                     | ✓                    | ✓ |
| WL 6     |                      |              | ✓            | ✓                  | ✓                  |               |              | ✓                |            | ✓            | ✓              |               |           |                |                    |                      |                        |                        |                |                |                |             | ✓               | ✓                 |                     |                      |   |
| WL 7     |                      |              | ✓            | ✓                  | ✓                  | ✓             | ✓            | ✓                |            |              |                |               |           |                |                    |                      |                        |                        |                |                |                |             | ✓               | ✓                 |                     |                      | ✓ |
| WL 8     |                      |              | ✓            |                    |                    |               |              |                  |            | ✓            | ✓              |               |           |                |                    |                      |                        |                        |                |                |                |             | ✓               |                   |                     |                      | ✓ |
| WL 9     |                      |              | ✓            |                    | ✓                  |               |              | ✓                |            |              |                |               |           |                |                    |                      |                        |                        |                |                |                |             | ✓               | ✓                 |                     |                      | ✓ |
| WL 10    |                      |              | ✓            | ✓                  | ✓                  | ✓             |              |                  |            |              |                |               |           |                |                    |                      |                        |                        |                |                |                |             | ✓               | ✓                 | ✓                   | ✓                    | ✓ |
| WL 11    |                      |              | ✓            | ✓                  | ✓                  | ✓             |              |                  |            | ✓            |                |               |           |                |                    |                      |                        |                        |                |                |                |             | ✓               | ✓                 |                     |                      |   |

|       |   |   |   |   |   |   |   |   |   |   |   |   |  |   |   |   |   |   |   |   |   |   |   |   |   |   |   |
|-------|---|---|---|---|---|---|---|---|---|---|---|---|--|---|---|---|---|---|---|---|---|---|---|---|---|---|---|
| WL 12 | ✓ |   |   | ✓ | ✓ | ✓ | ✓ | ✓ |   | ✓ | ✓ |   |  |   | ✓ | ✓ |   |   |   |   | ✓ | ✓ | ✓ |   |   |   |   |
| WL 13 |   |   | ✓ | ✓ | ✓ |   |   |   |   | ✓ |   |   |  |   |   |   |   |   |   |   |   | ✓ | ✓ | ✓ |   | ✓ |   |
| WL 14 | ✓ | ✓ | ✓ | ✓ |   | ✓ | ✓ |   |   |   | ✓ | ✓ |  | ✓ | ✓ | ✓ |   | ✓ |   |   |   |   |   | ✓ |   |   |   |
| WL 15 |   | ✓ | ✓ |   | ✓ |   |   |   |   |   | ✓ |   |  |   |   |   |   |   |   |   |   | ✓ | ✓ | ✓ |   |   |   |
| WL 16 |   |   |   |   | ✓ | ✓ |   |   | ✓ |   |   |   |  |   |   | ✓ |   | ✓ |   | ✓ | ✓ | ✓ | ✓ | ✓ | ✓ | ✓ |   |
| WL 17 | ✓ | ✓ | ✓ | ✓ | ✓ |   | ✓ |   | ✓ |   | ✓ | ✓ |  |   | ✓ | ✓ |   | ✓ | ✓ | ✓ | ✓ | ✓ | ✓ | ✓ | ✓ | ✓ |   |
| WL 18 |   |   | ✓ |   | ✓ |   |   | ✓ |   | ✓ | ✓ |   |  |   |   |   | ✓ |   |   |   |   | ✓ | ✓ | ✓ |   | ✓ |   |
| WL 19 |   |   | ✓ |   | ✓ |   |   |   |   | ✓ |   |   |  |   |   |   |   |   |   |   |   | ✓ | ✓ |   |   |   |   |
| WL 20 |   |   |   |   | ✓ |   |   |   |   |   | ✓ |   |  |   |   | ✓ |   | ✓ | ✓ | ✓ | ✓ | ✓ | ✓ | ✓ |   |   |   |
| WL 21 |   |   |   | ✓ | ✓ | ✓ |   | ✓ | ✓ |   | ✓ |   |  |   | ✓ | ✓ |   |   |   |   |   | ✓ | ✓ | ✓ | ✓ | ✓ |   |
| WL 22 |   |   |   | ✓ | ✓ | ✓ |   |   |   |   |   |   |  |   |   |   |   |   |   |   |   | ✓ |   |   |   | ✓ |   |
| WL 23 |   |   | ✓ |   | ✓ |   |   |   |   |   | ✓ | ✓ |  |   |   |   |   |   |   |   |   |   | ✓ | ✓ | ✓ | ✓ |   |
| WL 24 |   |   |   | ✓ | ✓ |   |   |   |   |   |   |   |  |   | ✓ | ✓ |   |   |   |   |   | ✓ | ✓ | ✓ |   | ✓ |   |
| WL 25 |   |   | ✓ | ✓ | ✓ | ✓ |   | ✓ |   |   | ✓ |   |  |   |   |   |   |   |   |   |   | ✓ | ✓ | ✓ | ✓ |   |   |
| WL 26 |   |   |   | ✓ | ✓ |   |   |   |   |   | ✓ | ✓ |  |   |   |   |   |   |   |   |   |   | ✓ |   |   | ✓ |   |
| WL 27 |   |   |   |   | ✓ |   |   |   |   |   |   |   |  |   |   |   |   |   |   |   |   |   | ✓ | ✓ | ✓ |   |   |
| WL 28 |   |   | ✓ |   | ✓ | ✓ |   | ✓ |   | ✓ | ✓ |   |  |   |   |   |   |   |   |   |   |   | ✓ | ✓ |   | ✓ | ✓ |
| WL 29 |   |   | ✓ | ✓ | ✓ | ✓ |   | ✓ |   |   | ✓ |   |  | ✓ |   |   |   |   |   |   |   |   | ✓ | ✓ | ✓ | ✓ | ✓ |
| WL 30 |   |   |   |   | ✓ |   |   |   |   | ✓ | ✓ |   |  |   |   |   |   |   |   |   |   |   |   |   |   |   |   |
| WL 31 |   |   |   |   | ✓ |   |   |   |   |   |   |   |  |   |   |   |   |   |   |   |   |   |   |   | ✓ |   |   |
| WL 32 |   | ✓ | ✓ | ✓ | ✓ | ✓ |   |   |   |   | ✓ | ✓ |  |   | ✓ |   |   |   |   |   |   |   | ✓ | ✓ | ✓ | ✓ | ✓ |
| WL 33 |   |   | ✓ |   | ✓ | ✓ |   | ✓ |   |   | ✓ |   |  |   |   |   |   |   |   |   |   |   | ✓ | ✓ |   | ✓ |   |
| WL 34 |   |   |   |   | ✓ | ✓ |   |   |   |   |   |   |  |   |   |   |   |   |   |   |   |   | ✓ | ✓ |   | ✓ |   |

WM = Weight loss maintenance

WL = Weight loss
